# Supplementary material
Source: PubMed Central journal article supplement (PMC4405132)

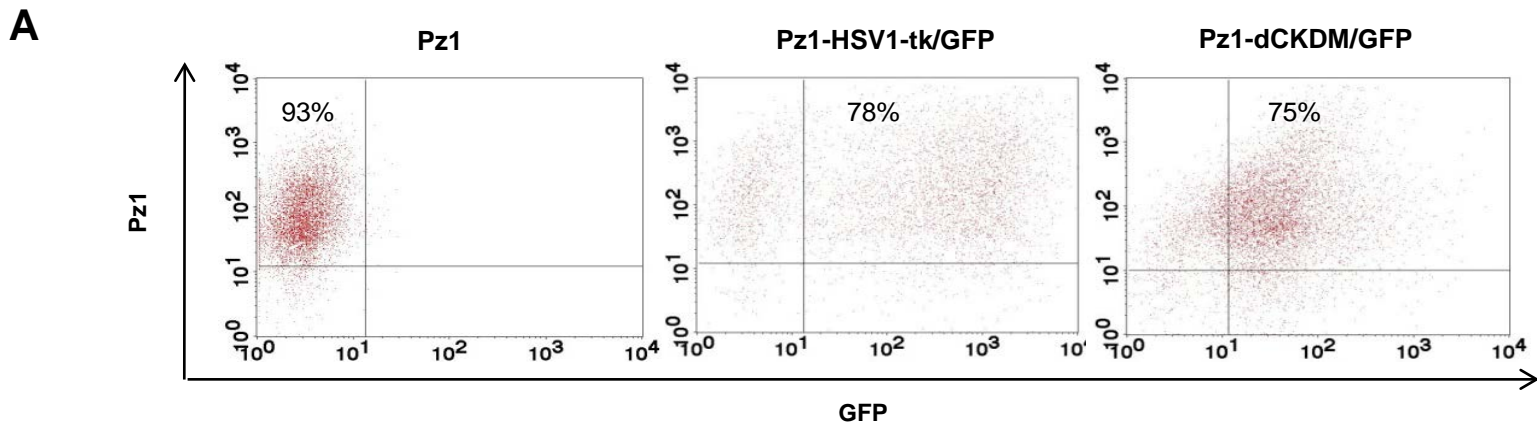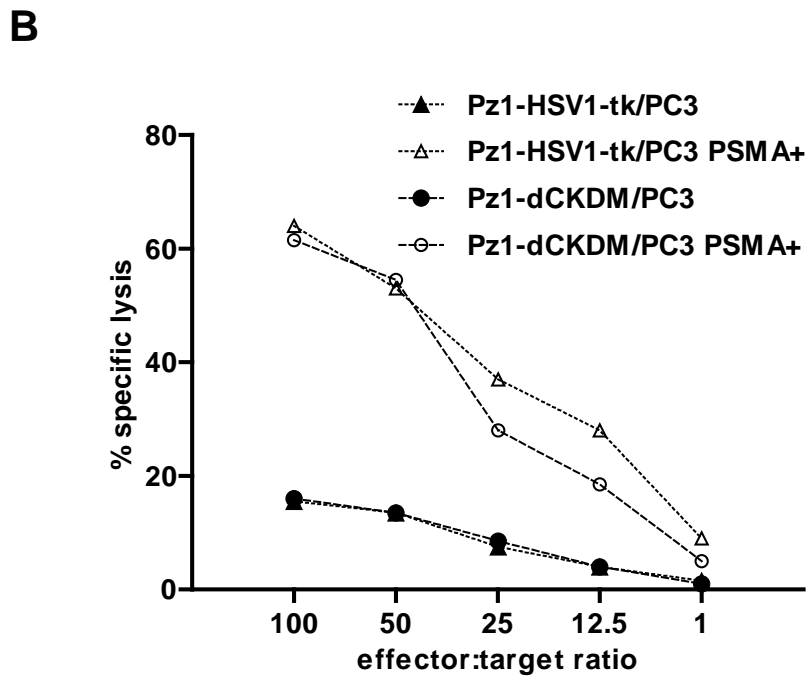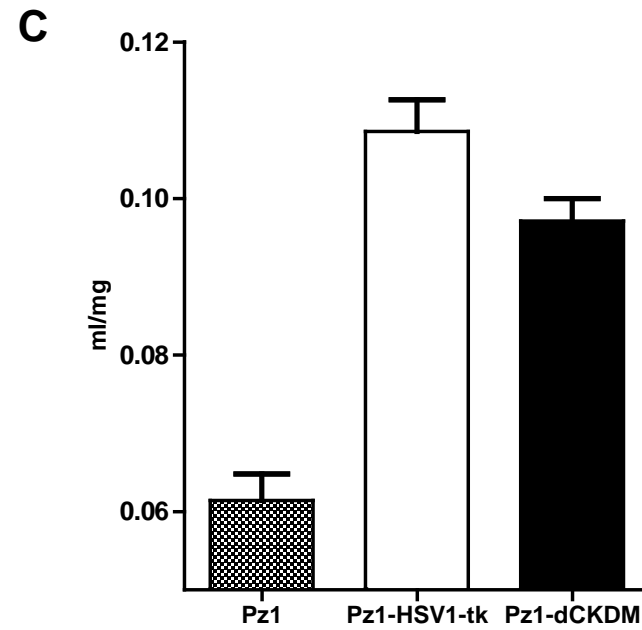

Supplemental Figure 1.

Supplement: NIHMS681157-supplement-Supple_Fig.pdf [file NIHMS681157-supplement-Supple_Fig.pdf]
